# Supplementary material for: Isostructurality in amino molecular salts of two dicarboxylic acids driven by noncovalent synthons
Source: Royal Society of Chemistry journal article supplement (doi:10.1039/d2ce00822j), 2022-01-01
Supplement: d2ce00822j1.pdf [file d2ce00822j1.pdf]

# Supporting Information

## Isostructurality in Amino Molecular Salts of Two Dicarboxylic Acids Driven by Noncovalent Synthons

*Raghavender Medishetty,<sup>\*a</sup> Akansha Ekka,<sup>a</sup> Caroline Evania Mulijanto,<sup>b</sup> Rika Tandiana,<sup>b</sup>  
and Jagadese J. Vittal<sup>\*b</sup>*

a. Department of Chemistry, Indian Institute of Technology Bhilai, Raipur, Chhattisgarh 492015, India.

b. Department of Chemistry, National University of Singapore, 3 Science Drive 3, Singapore 117543. Fax:  
(+65) 6779 1691.

**Table S1.** Cell data for 1-6.

| Crystal Data                           | ndc-4apy (1)                                                  | cca-4apy (2)                                                  | ndc-2abi (3)                                                  | cca-2abi (4)                                                  | ndc-2apy (5)                                                  | cca-2apy (6)                                                  |
|----------------------------------------|---------------------------------------------------------------|---------------------------------------------------------------|---------------------------------------------------------------|---------------------------------------------------------------|---------------------------------------------------------------|---------------------------------------------------------------|
| CCDC Number                            | 2075478                                                       | 2075479                                                       | 2075480                                                       | 2075481                                                       | 2075482                                                       | 2075483                                                       |
| Formula                                | C <sub>22</sub> H <sub>28</sub> N <sub>4</sub> O <sub>8</sub> | C <sub>20</sub> H <sub>28</sub> N <sub>4</sub> O <sub>8</sub> | C <sub>26</sub> H <sub>24</sub> N <sub>6</sub> O <sub>5</sub> | C <sub>24</sub> H <sub>24</sub> N <sub>6</sub> O <sub>5</sub> | C <sub>22</sub> H <sub>20</sub> N <sub>4</sub> O <sub>4</sub> | C <sub>20</sub> H <sub>24</sub> N <sub>4</sub> O <sub>6</sub> |
| Mol. Wt.                               | 476.48                                                        | 452.46                                                        | 500.51                                                        | 476.49                                                        | 404.42                                                        | 416.43                                                        |
| Crystal system                         | monoclinic                                                    | monoclinic                                                    | monoclinic                                                    | monoclinic                                                    | triclinic                                                     | monoclinic                                                    |
| Sp. Gr., Z                             | <i>P</i> 2 <sub>1</sub> / <i>c</i> , 2                        | <i>P</i> 2 <sub>1</sub> / <i>c</i> , 2                        | <i>C</i> 2/ <i>c</i> , 4                                      | <i>Cc</i> ,* 4                                                | <i>P</i> 1̄, 2                                                | <i>P</i> 2 <sub>1</sub> / <i>c</i> , 4                        |
| a, Å                                   | 7.2366(5)                                                     | 7.0741(11)                                                    | 17.7868(13)                                                   | 17.637(2)                                                     | 9.1101(5)                                                     | 9.7799(11)                                                    |
| b, Å                                   | 11.3931(8)                                                    | 11.0582(17)                                                   | 9.9141(7)                                                     | 10.0843(13)                                                   | 10.3633(6)                                                    | 12.2291(15)                                                   |
| c, Å                                   | 14.1809(10)                                                   | 14.289(2)                                                     | 12.5079(9)                                                    | 12.2714(15)                                                   | 11.2788(7)                                                    | 18.194(2)                                                     |
| α, °                                   | 90                                                            | 90                                                            | 90                                                            | 90                                                            | 100.613(2)                                                    | 90                                                            |
| β, °                                   | 96.390(2)                                                     | 98.460(3)                                                     | 100.210(2)                                                    | 102.452(3)                                                    | 98.629(2)                                                     | 93.443(3)                                                     |
| γ, °                                   | 90                                                            | 90                                                            | 90                                                            | 90                                                            | 113.035(2)                                                    | 90                                                            |
| V, Å <sup>3</sup>                      | 1161.91(14)                                                   | 1105.6(3)                                                     | 2170.7(3)                                                     | 2131.2(5)                                                     | 933.68(10)                                                    | 2172.1(4)                                                     |
| D <sub>calc</sub> (g/cm <sup>3</sup> ) | 1.362                                                         | 1.359                                                         | 1.532                                                         | 1.485                                                         | 1.439                                                         | 1.273                                                         |
| μ (mm <sup>-1</sup> )                  | 0.105                                                         | 0.106                                                         | 0.109                                                         | 0.107                                                         | 0.102                                                         | 0.095                                                         |
| GOOF                                   | 1.059                                                         | 1.263                                                         | 1.073                                                         | 1.105                                                         | 1.035                                                         | 1.027                                                         |
| R <sub>1</sub>                         | 0.0481                                                        | 0.0699                                                        | 0.0538                                                        | 0.0485                                                        | 0.0402                                                        | 0.0794                                                        |
| wR <sub>2</sub>                        | 0.1250                                                        | 0.1858                                                        | 0.1475                                                        | 0.1380                                                        | 0.1001                                                        | 0.1914                                                        |

\* Flack parameter 0.3(6)

In 2, 4 and 6, cca has static disorder as shown in Fig. 1.

**Table S2.** The hydrogen bond table for 1.

| D-H...A                    | d(D-H) / Å | d(H...A) / Å | D...A / Å | D-H...A / (°) |
|----------------------------|------------|--------------|-----------|---------------|
| N1-H1...O1                 | 0.870      | 1.784        | 2.653     | 176.24        |
| N2-H2A...O4 <sup>(a)</sup> | 0.870      | 2.041        | 2.887     | 163.93        |
| N2-H2B...O3 <sup>(b)</sup> | 0.870      | 2.139        | 2.992     | 166.89        |
| O3-H3A...O1                | 0.848      | 1.923        | 2.771     | 177.58        |
| O3-H3B...O2 <sup>(c)</sup> | 0.858      | 1.936        | 2.790     | 172.98        |
| O4-H4A...O2 <sup>(d)</sup> | 0.903      | 1.906        | 2.809     | 178.46        |
| O4-H4B...O3                | 0.802      | 2.106        | 2.896     | 168.34        |

Symmetry code: a = [x+1, -y+1/2, z-1/2]; b = [-x+2, y+1/2, -z+1/2]; c = [-x+1, y-1/2, -z+1/2]; d = [-x+1, -y+1, -z+1]

**Table S3.** The hydrogen bond table for **2**.

| D-H...A                    | d(D-H) / Å | d(H..A) / Å | D...A / Å | D-H...A / (°) |
|----------------------------|------------|-------------|-----------|---------------|
| N1-H1...O1                 | 0.986      | 1.687       | 2.671     | 175.40        |
| N2-H2A...O4 <sup>(a)</sup> | 0.909      | 2.027       | 2.931     | 172.25        |
| N2-H2B...O3 <sup>(b)</sup> | 0.854      | 2.020       | 2.850     | 163.79        |
| O3-H3A...O4                | 0.851      | 2.018       | 2.863     | 171.58        |
| O3-H3B...O2                | 0.810      | 1.958       | 2.762     | 172.10        |
| O4-H4A...O2 <sup>(c)</sup> | 0.858      | 1.919       | 2.772     | 172.41        |
| O4-H4B...O1 <sup>(d)</sup> | 0.788      | 1.917       | 2.700     | 172.71        |

**Symmetry code:** **a** = [x+1, -y+3/2, z-1/2]; **b** = [-x+2, y-1/2, -z+1/2]; **c** = [x, -y+3/2, z+1/2]; **d** = [-x+1, -y+1, -z+1]

**Table S4.** The hydrogen bond table for **3**.

| D-H...A                    | d(D-H) / Å | d(H..A) / Å | D...A / Å | D-H...A / (°) |
|----------------------------|------------|-------------|-----------|---------------|
| N1-H1...O1 <sup>(a)</sup>  | 0.868      | 1.913       | 2.779     | 175.73        |
| N2-H2...O2                 | 0.871      | 1.916       | 2.746     | 158.68        |
| N3-H3A...O1 <sup>(b)</sup> | 0.868      | 2.024       | 2.887     | 172.19        |
| N3-H3B...O2 <sup>(c)</sup> | 0.868      | 2.047       | 2.875     | 159.09        |
| C6-H6...O3                 | 0.950      | 2.556       | 3.448     | 156.43        |
| O3-H3W...O2                | 0.865      | 2.086       | 2.911     | 159.13        |

**Symmetry code:** **a** = [-x+1/2, y-1/2, -z+3/2]; **b** = [-x+1/2, -y+1/2, -z+1]; **c** = [-x+1/2, y-1/2, -z+3/2]

**Table S5.** The hydrogen bond table for **4**.

| D-H...A                     | d(D-H) / Å | d(H..A) / Å | D...A / Å | D-H...A / (°) |
|-----------------------------|------------|-------------|-----------|---------------|
| N1-H1...O4 <sup>(a)</sup>   | 0.880      | 1.870       | 2.749     | 177.14        |
| N2-H2...O1                  | 0.880      | 1.892       | 2.722     | 156.44        |
| N3-H3A...O3 <sup>(b)</sup>  | 0.880      | 2.057       | 2.899     | 159.80        |
| N3-H3B...O4 <sup>(c)</sup>  | 0.880      | 2.003       | 2.856     | 162.96        |
| C6-H6...O1W                 | 0.950      | 2.651       | 3.531     | 154.41        |
| C13-H13...O1W               | 0.950      | 2.596       | 3.487     | 156.21        |
| N4-H4...O2 <sup>(d)</sup>   | 0.880      | 1.877       | 2.756     | 177.98        |
| N5-H5...O3 <sup>(e)</sup>   | 0.880      | 1.888       | 2.749     | 165.57        |
| N6-H6A...O1 <sup>(f)</sup>  | 0.880      | 1.992       | 2.833     | 159.47        |
| N6-H6B...O2 <sup>(g)</sup>  | 0.880      | 2.000       | 2.857     | 164.46        |
| O1W-H1W...O3 <sup>(h)</sup> | 0.985      | 2.023       | 2.826     | 137.12        |
| O1W-H2W...O1                | 0.985      | 2.067       | 2.850     | 135.05        |

**Symmetry code:** **a** = [x+1/2, -y+1/2, z-1/2]; **b** = [x+1/2, -y+1/2, z-1/2]; **c** = [x+1/2, y+1/2, z]; **d** = [x-1/2, y-1/2, z]; **e** = [x, -y+1, z-1/2]; **f** = [x-1/2, y-1/2, z]; **g** = [x-1/2, -y+3/2, z-1/2]; **h** = [x, -y+1, z-1/2]

**Table S6.** The hydrogen bond table for **5**.

| <b>D-H...A</b>             | <b>d(D-H) / Å</b> | <b>d(H..A) / Å</b> | <b>D...A / Å</b> | <b>D-H...A / (°)</b> |
|----------------------------|-------------------|--------------------|------------------|----------------------|
| N1-H1...O1                 | 0.942(10)         | 1.702(10)          | 2.6371(13)       | 171.2(17)            |
| C1-H1A...O4 <sup>(a)</sup> | 0.95              | 2.34               | 3.2060(15)       | 151.9                |
| N2-H2A...O2                | 0.939(10)         | 1.854(10)          | 2.7927(13)       | 179.0(15)            |
| N2-H2B...O3 <sup>(b)</sup> | 0.928(9)          | 2.044(12)          | 2.9024(13)       | 153.2(14)            |
| N3-H3...O3                 | 0.942(10)         | 1.715(10)          | 2.6524(13)       | 173.5(16)            |
| N4-H4A...O4                | 0.931(10)         | 1.859(10)          | 2.7885(13)       | 176.4(15)            |
| N4-H4B...O2 <sup>(c)</sup> | 0.926(9)          | 1.917(10)          | 2.8392(13)       | 174.0(16)            |

**Symmetry code:** **a** = [1-x,1-y,-z]; **b** = [1-x,1-y,1-z]; **c** = [+x,+y,-1+z]

**Table S7.** The hydrogen bond table for **6**.

| <b>D-H...A</b>               | <b>d(D-H) / Å</b> | <b>d(H..A) / Å</b> | <b>D...A / Å</b> | <b>D-H...A / (°)</b> |
|------------------------------|-------------------|--------------------|------------------|----------------------|
| N1-H1N...O2 <sup>(a)</sup>   | 0.898             | 1.805              | 2.700            | 174.71               |
| N2-H21N...O1W <sup>(b)</sup> | 0.892             | 1.979              | 2.852            | 165.99               |
| N2-H22N...O1 <sup>(c)</sup>  | 0.888             | 1.971              | 2.846            | 168.29               |
| N3-H3N...O4                  | 0.901             | 1.717              | 2.612            | 172.47               |
| N4-H41N...O2W <sup>(d)</sup> | 0.888             | 2.104              | 2.915            | 151.52               |
| N4-H42N...O3                 | 0.887             | 2.030              | 2.900            | 166.74               |
| C15-H15...O4 <sup>(e)</sup>  | 0.940             | 2.624              | 3.331            | 132.42               |
| O1W-H11W...O1                | 0.847             | 2.040              | 2.873            | 167.64               |
| O1W-H12W...O3 <sup>(f)</sup> | 0.854             | 1.958              | 2.790            | 164.17               |
| O2W-H21W...O1 <sup>(g)</sup> | 0.858             | 2.069              | 2.846            | 150.19               |
| O2W-H22W...O2                | 0.854             | 1.920              | 2.756            | 165.89               |

**Symmetry code:** **a** = [-x+1, -y+2, -z]; **b** = [x-1, y, z]; **c** = [-x+1, -y+2, -z]; **d** = [-x, -y+1, -z]; **e** = [-x+1, y+1/2, -z+1/2]; **f** = [-x+1, -y+1, -z]; **g** = [-x+1, -y+2, -z]

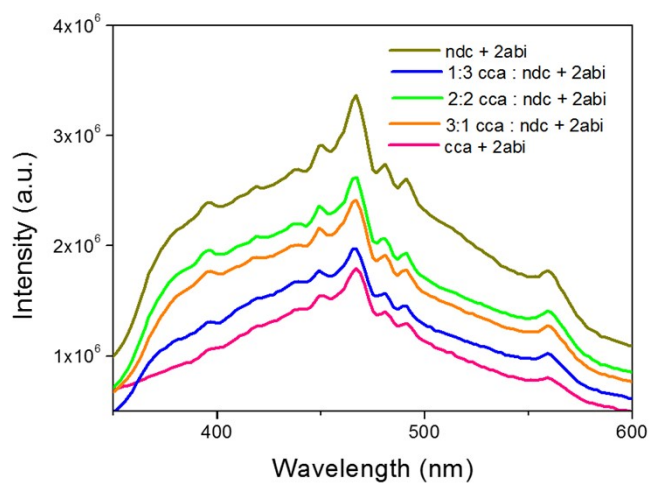

Figure S1. Photoluminescence properties of solid-solutions of molecular salts of **3** and **4**.

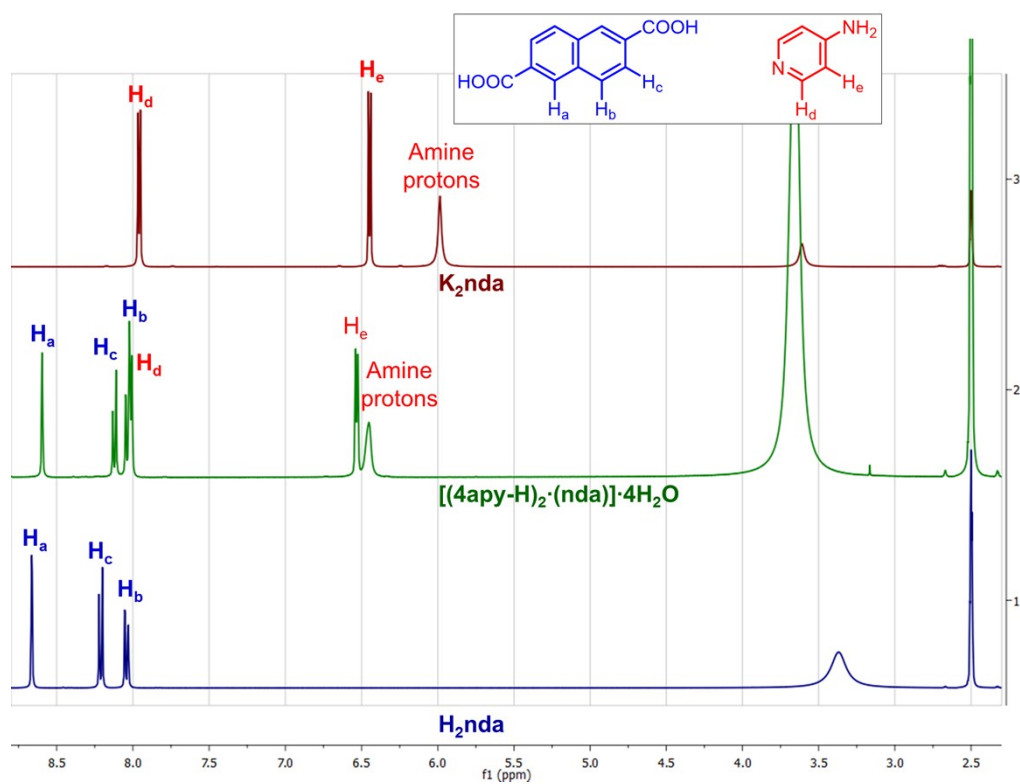

Figure S2. Shifting of  $^1\text{H}$ -NMR peaks of ndc in **1** to higher field suggests the electron cloud enhancement on the ndc core.

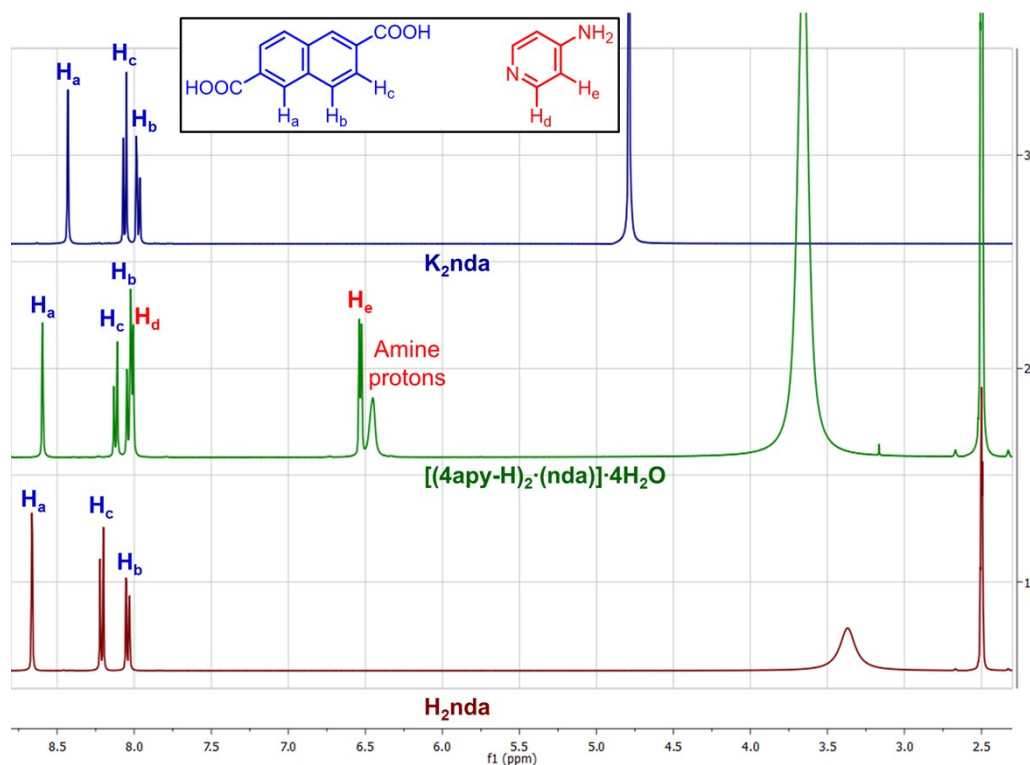

**Figure S3.** Shifting of  $^1\text{H}$ -NMR peaks of ndc in **1** to higher field suggests the electron cloud enhancement on the ndc core.

NMR spectra were recorded on a Bruker DRX 400 at room temperature. Chemical shifts are given in parts per million (ppm) and the spectra were referenced by using the residual solvent shift as internal standards (dimethyl sulfoxide- $d_6$ ,  $^1\text{H}$ -NMR  $\delta$  2.50).

The proton signals of ndc are slowly shifted to higher field from  $\text{H}_2\text{nda}$ , **1** and  $\text{K}_2\text{nda}$ . This suggests the slow accumulation of electron cloud on the ndc unit. In addition, ndc peaks of **1** are between  $\text{H}_2\text{nda}$  and  $\text{K}_2\text{nda}$ .

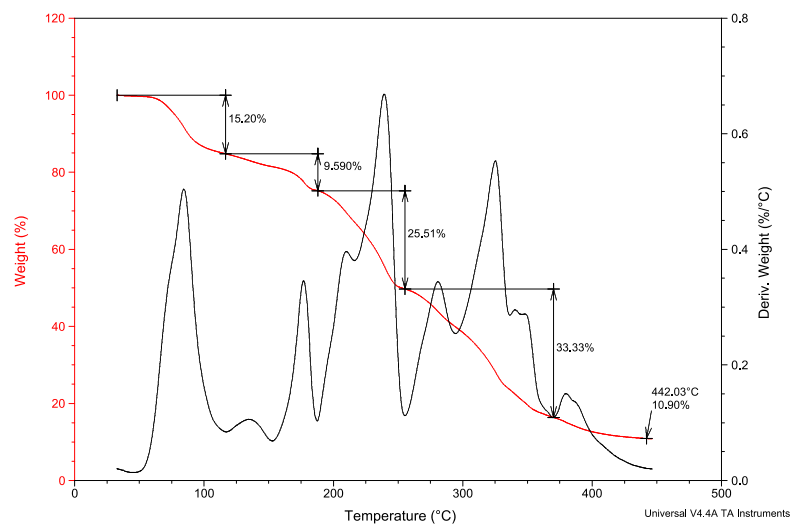

Figure S4. TGA analysis of compound 1.

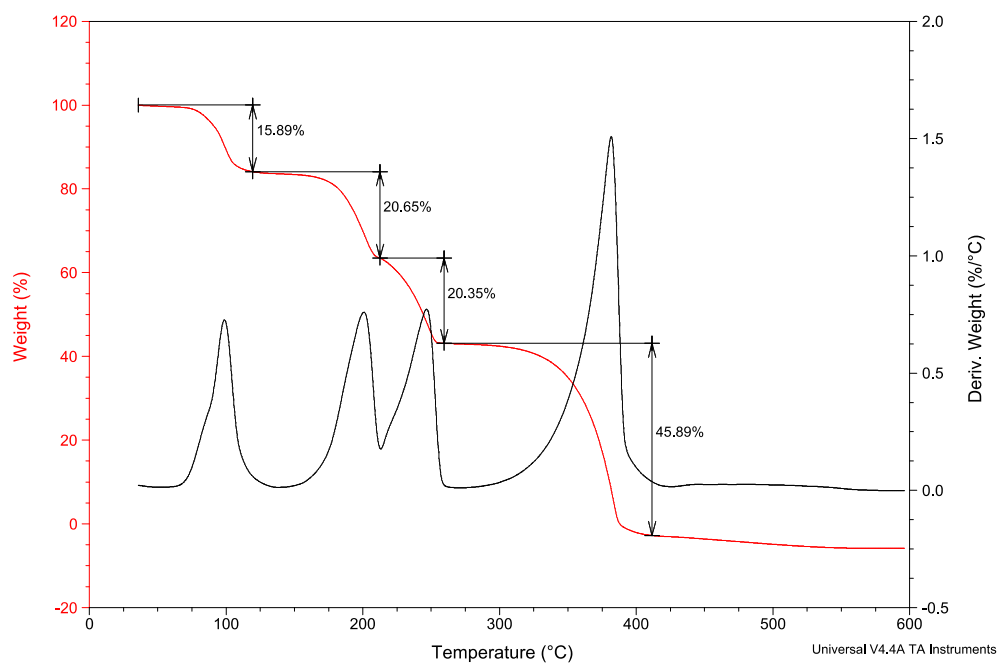

Figure S5. TGA analysis of compound 2.

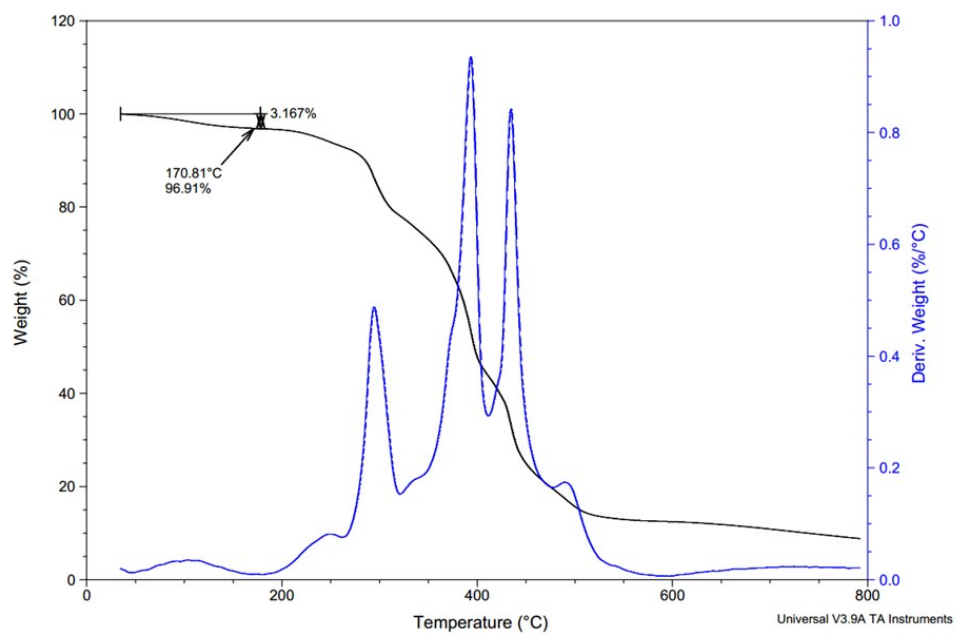

**Figure S6.** TGA analysis of compound 3.

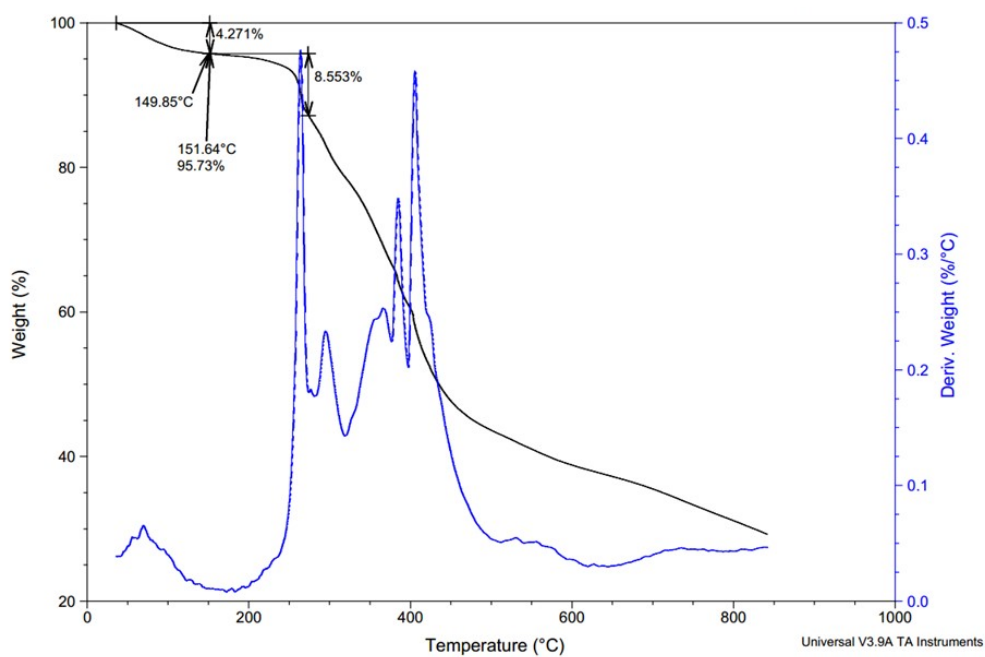

**Figure S7.** TGA analysis of compound 4.
